# Supplementary material
Source: Springer Nature journal article supplement (https://www.springermedizin.de/resource/supplementary/13643_2014_281_MOESM4_ESM.pdf/9681654)

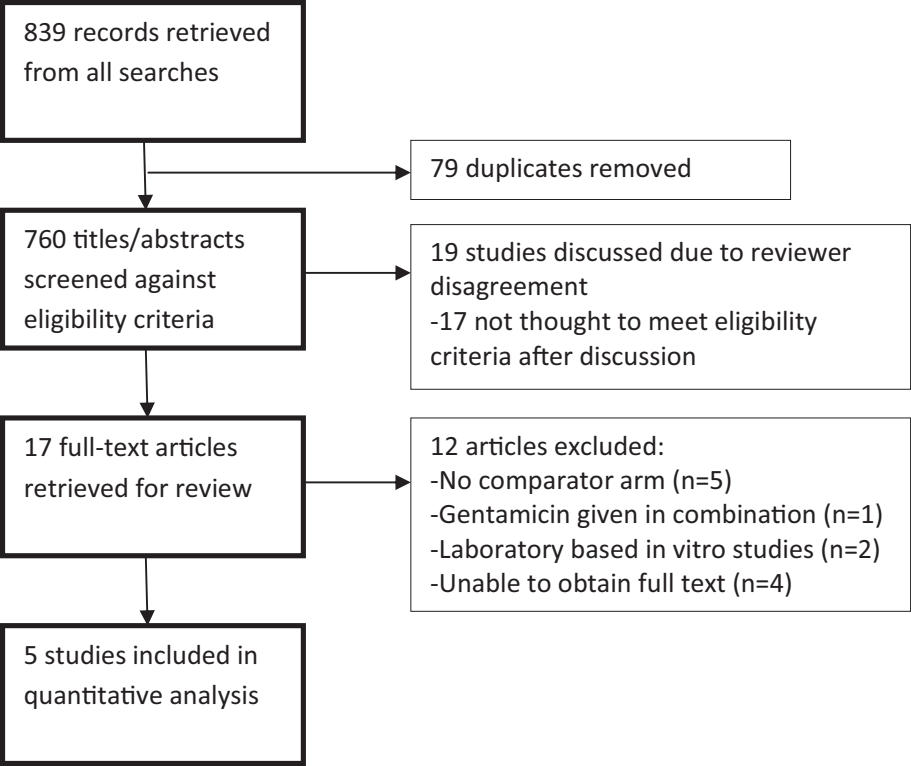

Supplement: MOESM4 [file 9681654]
